# Supplementary material for: Mental Health Well-Being and Attitudes on Mental Health Disorders among Family Physicians during COVID-19 Pandemic: A Connection with Resilience and Healthy Lifestyle
Source: MDPI journal article supplement (doi:10.3390/jcm11020438), 2022-01-15
Supplement: s1 [file s1]

## Supplementary material

**Table S1.** Experiences on mental health management and mental health well-being questionnaire scores according to diagnostics of MHD in a group of participants with positive MHD history (N=157)

| Parameter                                               | Confirmed MHD history (N=44) | Positive MHD perception (N=113) | Total (N=157)    | <i>p</i> <sup>*</sup> |
|---------------------------------------------------------|------------------------------|---------------------------------|------------------|-----------------------|
| <i>Actions regarding knowledge of MHD</i>               |                              |                                 |                  |                       |
| Taking medication                                       | 33 (75.0)                    | 62 (54.9)                       | 95 (60.5)        | 0.021                 |
| Going to psychotherapies                                | 20 (45.5)                    | 21 (18.6)                       | 41 (26.1)        | <0.001                |
| Consultation with psychiatrist                          | 23 (52.3)                    | 24 (21.2)                       | 47 (29.9)        | <0.001                |
| Trying to solve the problem alone                       | 16 (36.4)                    | 69 (61.1)                       | 85 (54.1)        | 0.005                 |
| Ignore the problem                                      | 2 (4.5)                      | 5 (4.4)                         | 7 (4.5)          | 0.998                 |
| <i>Best thing to acutely tackle mental health state</i> |                              |                                 |                  |                       |
| Psychiatrist consultation                               | 21 (47.7)                    | 17 (15.0)                       | 38 (24.2)        | <0.001                |
| Help not needed                                         | 4 (9.1)                      | 5 (4.4)                         | 9 (5.7)          | 0.268                 |
| Long vacation                                           | 17 (38.6)                    | 79 (69.9)                       | 96 (61.1)        | <0.001                |
| Self-help seminars                                      | 3 (6.8)                      | 24 (21.2)                       | 27 (17.2)        | 0.034                 |
| Something else                                          | 2 (4.5)                      | 7 (6.2)                         | 9 (5.7)          | 0.998                 |
| <i>Mental health well-being questionnaire scores</i>    |                              |                                 |                  |                       |
| BRCS score                                              | 16.0 (12.0-16.0)             | 15.0 (12.0-16.0)                | 15.0 (12.0-16.0) | 0.194 <sup>†</sup>    |
| BRS score                                               | 2.75 (2.41-3.5)              | 2.83 (2.33-3.67)                | 2.83 (2.33-3.5)  | 0.683 <sup>†</sup>    |
| FLQ score                                               | 68.0 (56.0-74.0)             | 60.0 (50.7-69.2)                | 61.0 (51.0-71.0) | 0.067 <sup>†</sup>    |
| OBI exhaustion                                          | 23.0 (18.5-26.0)             | 24.0 (21.0-26.0)                | 23.0 (20.0-26.0) | 0.160 <sup>†</sup>    |
| OBI disengagement                                       | 20.0 (18.0-22.5)             | 21.0 (19.0-24.0)                | 21.0 (18.0-23.0) | 0.190 <sup>†</sup>    |
| OBI total                                               | 44.5 (37.5-47.0)             | 44.0 (40.0-50.0)                | 44.0 (40.0-49.2) | 0.165 <sup>†</sup>    |
| SWLS score                                              | 20.5 (17.5-25.5)             | 22.0 (15.7-26.0)                | 22.0 (16.0-26.0) | 0.975 <sup>†</sup>    |
| WCW-JSS score                                           | 47.0 (39.0-50.0)             | 43.0 (36.0-50.0)                | 43.0 (36.7-50.0) | 0.581 <sup>†</sup>    |

Data are presented as N (%) and median (interquartile range)

MHD- mental health disorder; BRCS- Brief Resilient Coping Scale; BRS- Brief Resilience Scale; FLQ- Fantastic Lifestyle Questionnaire; OBI- Oldenburg Burnout Inventory; SWLS- Satisfaction with Life Scale; WCW-JSS- Warr-Cook-Wall Job Satisfaction Scale

\* chi-square test or Fisher's exact test

† Mann-Whitney U test

**Table S2.** Experiences on mental health management and mental health well-being questionnaire scores according to time of diagnosis in a group of participants with positive MHD history (N=157)

| Parameter                                               | During COVID-19 pandemic (N=77) | Before COVID-19 pandemic (N=80) | Total (N=157) | <i>p</i> <sup>*</sup> |
|---------------------------------------------------------|---------------------------------|---------------------------------|---------------|-----------------------|
| <i>Actions regarding knowledge of MHD</i>               |                                 |                                 |               |                       |
| Taking medication                                       | 51 (66.2)                       | 44 (55.0)                       | 95 (60.5)     | 0.151                 |
| Going to psychotherapies                                | 12 (15.6)                       | 29 (36.2)                       | 41 (26.1)     | 0.003                 |
| Consultation with psychiatrist                          | 24 (31.2)                       | 23 (28.7)                       | 47 (29.9)     | 0.742                 |
| Trying to solve the problem alone                       | 48 (62.3)                       | 37 (46.2)                       | 85 (54.1)     | 0.043                 |
| Ignore the problem                                      | 4 (5.2)                         | 3 (3.7)                         | 7 (4.5)       | 0.716                 |
| <i>Best thing to acutely tackle mental health state</i> |                                 |                                 |               |                       |
| Psychiatrist consultation                               | 21 (27.3)                       | 17 (21.2)                       | 38 (24.2)     | 0.380                 |
| Help not needed                                         | 0 (0.0)                         | 9 (11.3)                        | 9 (5.7)       | 0.002                 |

|                                                      |                  |                  |                  |                     |
|------------------------------------------------------|------------------|------------------|------------------|---------------------|
| Long vacation                                        | 57 (74.0)        | 39 (48.7)        | 96 (61.1)        | 0.001               |
| Self-help seminars                                   | 16 (20.8)        | 11 (13.8)        | 27 (17.2)        | 0.244               |
| Something else                                       | 2 (2.6)          | 7 (8.8)          | 9 (5.7)          | 0.168               |
| <i>Mental health well-being questionnaire scores</i> |                  |                  |                  |                     |
| BRCS score                                           | 15.0 (13.7-16.0) | 15.0 (12.0-16.0) | 15.0 (12.0-16.0) | 0.424 <sup>†</sup>  |
| BRS score                                            | 2.83 (2.33-3.5)  | 2.83 (2.41-3.67) | 2.83 (2.33-3.5)  | 0.593 <sup>†</sup>  |
| FLQ score                                            | 61.0 (51.0-68.0) | 61.0 (52.7-76.5) | 61.0 (51.0-71.0) | 0.042 <sup>†</sup>  |
| OBI exhaustion                                       | 25.0 (23.0-27.0) | 21.5 (19.0-25.0) | 23.0 (20.0-26.0) | <0.001 <sup>†</sup> |
| OBI disengagement                                    | 21.0 (20.0-24.0) | 20.0 (17.0-22.0) | 21.0 (18.0-23.0) | <0.001 <sup>†</sup> |
| OBI total                                            | 46.0 (42.7-52.0) | 40.0 (36.0-47.0) | 44.0 (40.0-49.2) | <0.001 <sup>†</sup> |
| SWLS score                                           | 22.0 (15.7-26.2) | 21.5 (17.0-26.0) | 22.0 (16.0-26.0) | 0.679 <sup>†</sup>  |
| WCW-JSS score                                        | 41.0 (35.7-49.0) | 47.0 (39.0-52.0) | 43.0 (36.7-50.0) | 0.013 <sup>†</sup>  |

Data are presented as N (%) and median (interquartile range)

MHD- mental health disorder; BRCS- Brief Resilient Coping Scale; BRS- Brief Resilience Scale; FLQ- Fantastic Lifestyle Questionnaire; OBI- Oldenburg Burnout Inventory; SWLS- Satisfaction with Life Scale; WCW-JSS- Warr-Cook-Wall Job Satisfaction Scale

\* chi-square test or Fisher's exact test

† Mann-Whitney U test

**Table S3.** Correlation of resilience, burnout and healthy lifestyle questionnaire scores with other relevant parameters in total study population (N=483)

| Parameter               | BRS                    | OBI total score        | FLQ                    |
|-------------------------|------------------------|------------------------|------------------------|
|                         | <i>r</i> ( <i>p</i> *) | <i>r</i> ( <i>p</i> *) | <i>r</i> ( <i>p</i> *) |
| Age (years)             | -0.157 (<0.001)        | 0.094 (0.038)          | -0.124 (0.006)         |
| Work experience (years) | -0.173 (<0.001)        | 0.106 (0.019)          | -0.105 (0.021)         |
| BRCS score              | 0.390 (<0.001)         | -0.393 (<0.001)        | 0.473 (<0.001)         |
| BRS score               | -                      | -0.503 (<0.001)        | 0.532 (<0.001)         |
| FLQ score               | 0.532 (<0.001)         | -0.656 (<0.001)        | -                      |
| OBI-exhaustion          | -0.511 (<0.001)        | 0.937 (<0.001)         | -0.633 (<0.001)        |
| OBI-disengagement       | -0.404 (<0.001)        | 0.899 (<0.001)         | -0.572 (<0.001)        |
| OBI total score         | -0.503 (<0.001)        | -                      | -0.656 (<0.001)        |
| SWLS score              | 0.394 (<0.001)         | -0.437 (<0.001)        | 0.545 (<0.001)         |
| WCW-JSS score           | 0.316 (<0.001)         | -0.538 (<0.001)        | 0.484 (<0.001)         |

BRCS- Brief Resilient Coping Scale; BRS- Brief Resilience Scale; FLQ- Fantastic Lifestyle Questionnaire; OBI- Oldenburg Burnout Inventory; SWLS- Satisfaction with Life Scale; WCW-JSS- Warr-Cook-Wall Job Satisfaction Scale

\* Spearman rank correlation

**Table S4.** Multivariate logistic regression analysis of independent predictors for positive mental health disorder history status

| Variables                | OR    | 95% CI      | <i>p</i> |
|--------------------------|-------|-------------|----------|
| Age (years)              | 0.987 | 0.971-1.004 | 0.120    |
| Gender (male vs. female) | 0.890 | 0.499-1.585 | 0.693    |
| BRS score                | 0.387 | 0.261-0.574 | <0.001   |
| FLQ score                | 0.970 | 0.945-0.995 | 0.021    |

|                 |       |             |       |
|-----------------|-------|-------------|-------|
| OBI total score | 1.014 | 0.976-1.053 | 0.455 |
|-----------------|-------|-------------|-------|

BRS- Brief Resilience Scale; FLQ- Fantastic Lifestyle Questionnaire; OBI- Oldenburg Burnout Inventory; 95% CI- 95% confidence interval; OR- adjusted odds ratio
